# Supplementary material for: The Replica Set Method is a Robust, Accurate, and High-Throughput Approach for Assessing and Comparing Lifespan in C. elegans Experiments
Source: Front Aging. 2022 Apr 28;3:861701. doi: 10.3389/fragi.2022.861701 (PMC9261357; doi:10.3389/fragi.2022.861701)
Supplement: Supplementary file 5 [file Table1.XLSX]

## Sheet: Key and Overview
Supplemental Table 1- C. elegans lifespan assay literature survey
Column information:
"# Animals Per Experiment"
	Blank cells indicate information was not found in reference
	Red highlighted text indicates that maximum value provided was unusually high
"# Trials"
	Blank cells indicate information was not found in reference
"Scoring Frequency (days)"
	Fixed scoring frequencies are indicated by a single value, variable scoring frequencies are indicated by a range.
"Censor Info? (A-D)"
	A = No mention of censoring and no data reported
	B = Mention of censoring but no data reported
	C = Discussed censoring and reported data at a summary level (# animals censored per trial or experiment)
	D = Discussed censoring and reported data for each observation or timepoint
	Note that no examples of category "D" were found among this set of publications
"Used Kaplan-Meier?"
	Was a Kaplan-Meier non-parametric survival treatment utilized? As this approach is the de-facto standard in the field, and most broadly supported by statistical tools for survival analysis, in a large number of cases this analysis is not explicitly mentioned in the paper, but if "stepped" survival curves are shown and log-rank is mentioned, the use of Kaplan-Meier as the lifespan estimator is imp…
	Yes = Kaplan-Meier estimator mentioned
	No = Another lifespan analysis approach was utilized, or no approach was mentioned and use of Kaplan-Meier could not be implied.
	Implied = Application of the Kaplan-Meier estimator was not explicitly mentioned, but "stepped" survival curves were shown, no other lifespan estimators were mentioned, software supporting Kaplan-Meier analysis was used, and in many cases statistical testing for differences in survival were performed using the log-rank test. In a small number of cases, a paper which applied Kaplan-Meier is cited …
"Used Log-Rank test?"
	Was the log-rank test used to test for statistical difference in lifespan between multiple conditions?
	Yes = log-rank was mentioned as the statistical test applied
	No = Another statistical test was used, or no statistical testing for differences in lifespan was applied.
"Interval Censoring?"
	Was the analysis performed with interval censoring, for applicable cases of non-parametric estimators such as Kaplan-Meier? We did not find any cases among these manuscripts were interval censoring was mentioned.
"Surv. Analysis Software"
	The software used for survival estimation, plotting, and statistical testing. Versions of software were often not reported, so version numbers are not included here.
	"unknown" indicates we could not find a mention of software for survival analysis in the paper.
"Software Supports Interval Censoring?"
	Does the software used support interval censoring for applicable non-parametric survival analysis? This support is based on any version of the software, and is not limited to the specific version of the software that might have been utilized in a given report. Where "Surv. Analysis Software" was "unknown", this will be NA. See supplemental table 2 for more information on software and survival ana…
"Lifespan Method Reference"
	The applicable reference if the paper referenced a prior publication for lifespan experiment and analysis methods. Blank if not applicable.

## Sheet: Literature Survey Table
Reference	Paper year	# Animals Per Experiment	# Trials	Scoring Frequency (days)	Censor Info? (A-D)	Used Kaplan-Meier?	Used Log-Rank test?	Interval Censoring?	Surv. Analysis Software	Software Supports Interval Censoring?	Lifespan Method Reference	Other Notes
Kell (2007) Free Radical Biology and Medicine 43, 1560	2007	60-80	3	1	A	no	no	no	unknown	NA	Johnson (1982) Proc. Natl. Acad. Sci. USA 79, 6603	The authors created their own estimator for mean lifespan and did their graphing in Excel
Iser (2007) PLoS ONE 2, e1240	2007	30-40	2	1-2	A	implied	yes	no	JMP	yes
Pinkston-Gosse (2007) Nature Genetics 39, 1403	2007	50-80	2	1-2	C	implied	yes	no	Statview	no
Kim (2007) Journal of Cell Biology 179, 41	2007	100		1-2	C	implied	yes	no	Statview	no	Wolff (2006) Cell 124, 1039	Paper was retracted, but not for the statistical analysis
Shaw (2007) Current Biology 17, 1635	2007	60	7	2	B	yes	yes	no	Statview	no
Schulz (2007) Cell Metabolism 6, 280	2007	100-150	1-7	1	B	implied	yes	no	SPSS	no	Kenyon (1993) Nature 366, 461
Dong (2007) Science 317, 660	2007	39-220	1	1-3	C	implied	yes	no	JMP	yes	Dillin (2002) Science 298, 830
Chen (2007) Aging Cell 6, 525	2007	39-184	1	2	B	yes	yes	no	Prism	no	Lithgow (1995) Proc. Natl Acad. Sci. USA 92, 7540
Bishop (2007) Nature 447, 545	2007	10-61	1-17	2	C	implied	yes	no	Prism	no
Panowski (2007) Nature 447, 550	2007	28-102	1-6	1-2	C	implied	yes	no	JMP	yes	Dillin (2002) Science 298, 830
Syntichaki (2007) Nature 445, 922	2007	40-118	3	1	C	implied	yes	no	Prism	no
Hansen (2007) Aging Cell 6, 95	2007	80	1-6	2	C	implied	yes	no	Stata	yes	Hansen (2005) PLoS Genet 1, 119
Evans (2008) Aging Cell 7, 879	2008	20-466	2-3	1-2	C	yes	yes	no	Statview	no	Shapira (2008) Methods Mol. Biol. 415, 429
Perez (2008) Cell Metabolism 8, 266	2008			1	A	implied	no	no	unknown	no	Hsin (1999) Nature 399, 362	Survival analysis approach inferred from cited paper. Survival only included in Supplemental fig 3.
Galbadage (2008) Mechanism of Ageing and Development 129, 507	2008	15-50	1-4	1	B	no	no	no	unknown	NA		Survival curves presented, but no information on analysis approach
Budovskaya (2008) Cell 134, 291	2008	200	1-3	2	A	implied	yes	no	unknown	NA	Apfeld (1999) Nature 402, 804
Steinkraus (2008) Aging Cell 7, 394	2008	90	3	2	A	no	no	no	Matlab	yes		Implemented their own suvival analysis approach in Matlab
Tullet (2008) Cell 132, 1025	2008	25-198	1-3	1-2	C	implied	yes	no	JMP	yes	Hsin (1999) Nature 399, 362
Gruber (2009) FEBS Letters 583, 3377	2009	174-183		1	B	yes	yes	no	unknown	NA		Review article
Oliveira (2009) Aging Cell 8, 524	2009	96-153	3	2	C	yes	yes	no	Statview	no	Sijen (2001) Cell 107, 465
Hsu (2009) Neurobiology of Aging 30, 1498	2009	360		1	B	yes	no	no	multiple: Statistica, Statview	no	Kenyon (1993) Nature 366, 461	No p-values included in article for survival curve comparison, might not have used a statistical test.
Park (2009) Aging Cell 8, 258	2009	60	2	1	A	yes	yes	no	unknown	NA
Chen (2009) PLoS Genet 5, e1000486	2009	30-149	2-3	2	B	implied	yes	no	Prism	no	Chen (2007) Aging Cell 6, 525
Jo (2009) Cell Metabolism 9, 440	2009			2	A	no	no	no	unknown	NA
Rahman (2010) AGING 2, 678	2010	51-115	2-8	2	C	implied	yes	no	Prism	no	Kenyon (1993) Nature 366, 461
Greer (2010) Nature 466, 383	2010	30-90	3	2-3	C	yes	yes	no	Statview	no	Greer (2007) Curr. Biol. 17, 1646
Lencastre (2010) Current Biology 20, 2159	2010	18-108	3	1-2	A	implied	yes	no	JMP	yes	Boehm (2005) Science 310, 1954
Schaffer (2010) Biogerentology 12, 195	2010		5	1-3	B	yes	yes	no	Prism	no	Gruber (2009) FEBS 583, 3377
Lee (2010) Current Biology 20, 2131	2010	69-210	2-4	1-2	C	implied	yes	no	Stata	yes	Apfeld (1999) Nature 402, 804	methods are in supplement, not in main article
Mouchiroud (2010) Aging Cell 10, 39	2010	60-80	1-6	1-2	C	yes	yes	no	XLSTAT	no	Masse (2008) PLoS ONE 3, e3354
David (2010) Plos Biol 8, e1000450	2010	94-107		2	A	implied	yes	no	Stata	yes	Apfeld (1999) Nature 402, 804
Ching (2010) Aging Cell 9, 545	2010	60-90	2-3	2	C	implied	yes	no	Statview	no	Kenyon (1993) Nature 366, 461
Schreiber (2010) PLoS Genet 6, e1000972	2010	38-306	4	1	C	implied	yes	no	Prism	no	Hansen (2005) PLoS Genet 1, e17
Maier (2010) Plos Biol 8, e1000376	2010	40-372	1-5	1	C	yes	yes	no	JMP	yes	Johnson (2001) J Gerontol A Biol Sci Med Sci 56, B331
Iwasa (2010) Aging Cell 9, 490	2010	60-86	2	2	C	yes	yes	no	Prism	no	Sutphin (2008) Exp Gerontol 43, 130
Onken (2010) PLoS ONE 5, e8758	2010	52-100	2-12	2	C	implied	yes	no	Prism	no	Kenyon (1993) Nature 366, 461
Burnett (2011) Nature 477, 482	2011	51-252	1-8	2	C	implied	yes	no	JMP	yes	Parker (2005) Nature Genet 37, 349
Lapierre (2011) Current Biology 18, 1507	2011	50-100	3-4	2-3	C	yes	yes	no	Stata	yes	Hansen (2005) PLoS Genet 1, 119
Ching (2011) Aging Cell 10, 506	2011	60	2-5	2-3	A	implied	yes	no	Statview	no	Kenyon (1993) Nature 366, 461
Lucanic (2011) Nature 473, 226	2011	10-197	1-6	1-2	C	yes	yes	no	Prism	no	Held (2006) Aging Cell 5, 283
Greer (2011) Nature 479, 365	2011	90	2-6	2-3	C	yes	yes	no	unknown	NA	Greer (2007) Curr. Biol. 17, 1646
Liu (2011) EMBO Journal 30, 2990	2011	41-149	3	1	C	yes	yes	no	Prism	no
Goudeau (2011) Plos Biol 9, e1000599	2011	28-274	2-5	2	C	implied	yes	no	Biopylife	yes	Hansen (2005) PLoS Genet 1, 119
Gaglia (2012) PLoS Genet 8, e1003133	2012	72-240	1-8	2	C	implied	yes	no	OASIS	no	Lee (2010) Curr. Biol. 20, 2131
Lehrbach (2012) RNA 18, 2220	2012			1	B	implied	yes	no	R	yes		main text doesn't include survival analysis methods; log-rank test is mentioned in supplemental figure captions
Tacutu (2012) PLoS ONE 7, e48282	2012	90	3	2	A	yes	yes	no	SPSS	no
Vilchez (2012) Nature 489, 263	2012	100	2	1-2	C	implied	yes	no	JMP	yes	Dillin (2002) Science 298, 830
Ni (2012) Aging Cell 11, 315	2012	26-257	2	1-2	A	yes	yes	no	SPSS	no	Rizki (2011) PLoS Genet 7, e1002235
Kashyap (2012) Journals Geront Series A: Biol Sci Med Sci 67A, 56	2012		2	1	B	yes	no	no	Prism	no
Lezzerini (2013) Aging Cell 13, 8	2013	100	3	2-3	B	implied	yes	no	Prism	no	Kenyon (1993) Nature 366, 461
Vora (2013) PLoS Genet 9, e1003737	2013	25-104	3	1-2	A	implied	yes	no	Prism	no
Chen (2013) Aging Cell 12, 932	2013	45-101	3	1-2	C	implied	yes	no	Prism	no	Alam (1996) Cell Metab. 12, 30
Liu (2013) EMBO Journal 32, 1529	2013	22-154	>1	1	B	yes	yes	no	unknown	NA	Apfeld (1999) Nature 402, 804
Xian (2013) Aging Cell 12, 398	2013	55	2-3	1	B	implied	yes	no	unknown	NA		Log-rank test is mentioned in the supplementary figures, although not in the main paper
Edwards (2013) PLoS ONE 8, e58345	2013	17-1425	2	2	A	yes	yes	no	Sigmaplot	no	Stiernagle (2006) WormBook 1-11
Xiao (2013) Cell 152, 806	2013	80-100	2-6	1	B	yes	yes	no	Prism	no	Hsu (2009) Neurobiol. Aging 30, 1498
Uno (2013) Cell Reports 3, 79	2013	29-67	3	2	A	implied	yes	no	unknown	NA		Log-rank mentioned in figure captions, no mention of survival analysis in main text
Yanase (2013) Drug Discoveries and Therapeutics 7, 29	2013			2	A	no	no	no	unknown	NA	Yazaki (2011) Oxid Med Cell Longev 2011, 596240	Appears no statistical analysis was applied or reported
Bansal (2014) PNAS 112, 277	2014	120	2	2-3	B	implied	yes	no	Prism	no
Carrano (2014) Nature Comm 5, 1	2014	30-80	1-4	2-3	C	implied	yes	no	JMP	yes
Pang (2014) Cell Metabolism 19, 221	2014	35-171	1	2	C	implied	yes	no	unknown	NA	Paek (2012) Cell Metabolism 16, 526	specific software not mentioned
Horikawa (2015) PLoS Genet 11, e1005023	2015	150	3	2-4	B	yes	no	no	Prism	no	Gerisch (2001) Dev Cell 1, 841	t-tests used to compare mean lifespan estimates from Kaplan-Meier.
Kelvin (2020) Aging (Albany NY) 12.12: 11185.	2020	100	3	2	C	no	no	no	unknown	NA
Wu (2020) Food & Function, 11(6), pp.5621-5634.	2020	138 - 212	2	2	A	implied	yes	no	Prism	no	Masse (2008) PLoS ONE 3, e3354
Morikiti (2018) Biochemical and biophysical research communications, 505(4), pp.1168-1173.	2018	90		2	A	no	no	no	unknown	NA
Pinto (2018) Redox biology, 18, pp.84-92.	2018	120	2	1-2	C	implied	yes	no	Prism	no
Newell Stamper (2018) Aging cell, 17(1), p.e12704	2018	20	10	1-3	C	implied	yes	no	R	yes
